# Supplementary material for: A substituent effect of phenylacetic acid coligand perturbed structures and magnetic properties observed in two triple-bridged azido-Cu(ii) chain compounds with ferromagnetic ordering and slow magnetic relaxation
Source: Royal Society of Chemistry journal article supplement (doi:10.1039/c7dt01338h), 2017-01-01
Supplement: c7dt01338h1.pdf [file c7dt01338h1.pdf]

## Supporting Information

### Substituent effect of phenylacetic acid coligands perturbed structures and magnetic properties observed in two triple-bridged azido-Cu(II) chain compounds with ferromagnetic ordering and slow magnetic relaxation

Xiangyu Liu,<sup>\*a</sup> Xiaohui Ma,<sup>a</sup> Peipei Cen,<sup>a,b</sup> Yuewei Wu,<sup>a</sup> Chengcheng Zhang,<sup>a</sup> Quan Shi,<sup>\*c</sup> Weiming Song,<sup>a</sup> Gang Xie<sup>b</sup> and Sanping Chen<sup>\*b</sup>

<sup>a</sup> College of Chemistry and Chemical Engineering, State Key Laboratory of High-efficiency Coal Utilization and Green Chemical Engineering, Ningxia University, Yinchuan 750021, China

<sup>b</sup> Key Laboratory of Synthetic and Natural Functional Molecule Chemistry of Ministry of Education, College of Chemistry and Materials Science, Northwest University, Xi'an 710069, China

<sup>c</sup> Dalian Institute of Chemical Physics, Chinese Academy of Sciences, 457 Zhongshan Road, Dalian 116023, China

#### \*Corresponding author

**Dr. Xiangyu Liu**

**Tel.: +86-951-2062004**

**Fax: +86-951-2062860**

**E-mail: xiangyuliu432@126.com**

#### \*Corresponding author

**Prof. Sanping Chen**

**Tel.: +86-29-88302604**

**Fax: +86-29-88302604**

**E-mail: sanpingchen@126.com**

#### \*Corresponding author

**Dr. Quan Shi**

**Tel.: +86-411-84379213**

**Fax: +86-411-84379213**

**E-mail: shiquan@dicp.ac.cn**

## Contents

**Fig. S1** PXRD patterns for compounds: (a) **1**, (b) **2**.

**Fig. S2**  $\chi_M$  vs  $T$  plots for **1** (a) and **2** (b).

**Table S1.** Selected Bond Lengths (Å) and Bond Angles (°) for **1**.

**Table S2.** Selected Bond Lengths (Å) and Bond Angles (°) for **2**.

**Table S3.** The charge distributions of Cu(II) ions and coordination atoms for compounds **1** and **2**.

**Table S4.** Atomic spin densities (in au) in all of their spin states (for def2-tzvp basis set).

**Table S5.** Structural and magnetic parameters for Cu(II)-azido mixed-bridged compounds.

**Table S6.** Structural and magnetic parameters for four triple-bridged azido-Cu(II) compounds.

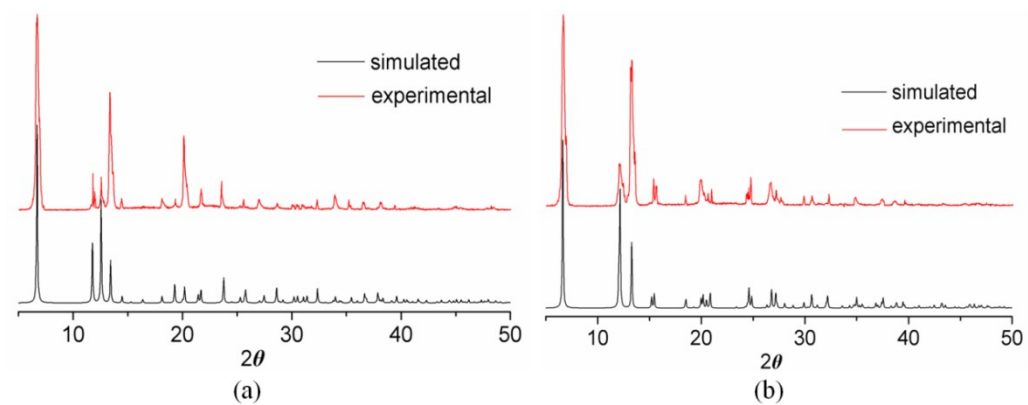

Fig. S1 PXR D patterns for compounds: (a) 1, (b) 2.

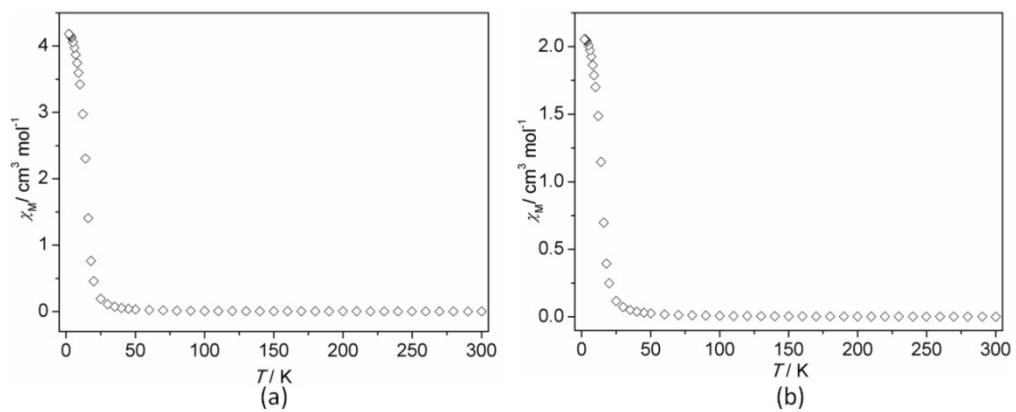

Fig. S2  $\chi_M$  vs  $T$  plots for 1 (a) and 2 (b).

**Table S1.** Selected bond lengths [Å] and angles [°] for compound **1**.

| <b>1</b>          |           |                     |          |
|-------------------|-----------|---------------------|----------|
| Cu(1)-O(1)        | 1.945(5)  | O(2)-Cu(1)-O(1)     | 179.0(3) |
| Cu(1)-O(2)#1      | 1.942(5)  | O(2)#1-Cu(1)-N(1)#1 | 91.4(2)  |
| Cu(1)-O(3)        | 2.439(6)  | O(1)-Cu(1)-N(1)#1   | 89.5(2)  |
| Cu(1)-N(1)        | 2.007(8)  | O(2)-Cu(1)-N(1)     | 89.1(2)  |
| Cu(1)-N(1)#1      | 2.001(7)  | O(1)-Cu(1)-N(1)     | 90.0(2)  |
| N(1)-N(2)         | 1.198(6)  | N(1)#1-Cu(1)-N(1)   | 176.3(3) |
| N(2)-N(3)         | 1.125(7)  | C(1)-O(1)-Cu(1)     | 131.1(5) |
| O(3)-C(9)         | 1.433(9)  | N(2)-N(1)-Cu(1)     | 122.6(7) |
| C(1)-O(1)         | 1.246(11) | C(9)-O(4)-Cu(1)     | 118.2(6) |
| C(1)-O(2)         | 1.266(11) | O(3)-Cu(1)-N(1)     | 99.8(2)  |
| C(8)-F(1)         | 1.342(2)  | N(3)-N(2)-N(1)      | 178.5(8) |
| #1 1-x,-1/2+y,1-z |           |                     |          |

**Table S2.** Selected bond lengths [Å] and angles [°] for compound **2**.

| <b>2</b>          |                  |                     |          |
|-------------------|------------------|---------------------|----------|
| Cu(1)-O(1)        | 1.935(6)         | O(1)-Cu(1)-O(2)#1   | 179.0(3) |
| Cu(1)-O(2)        | 1.947(6)         | O(1)-Cu(1)-N(1)#1   | 90.0(2)  |
| Cu(1)-O(3)        | 2.427(7)         | O(2)#1-Cu(1)-N(1)#1 | 90.4(3)  |
| Cu(1)-N(1)        | 2.023(10)        | O(1)-Cu(1)-N(1)     | 90.9(2)  |
| Cu(1)-N(1)#1      | 1.975(10)        | O(2)#1-Cu(1)-N(1)   | 88.8(2)  |
| Cu(1)-O(3)#1      | 2.469(7)         | N(1)#1-Cu(1)-N(1)   | 178.6(2) |
| N(1)-N(2)         | 1.206(6)         | C(8)-O(1)-Cu(1)     | 127.8(5) |
| N(2)-N(3)         | 1.131(7)         | N(2)-N(1)-Cu(1)#2   | 122.7(8) |
| F(1)-C(1)         | 1.36(3)          | N(2)-N(1)-Cu(1)     | 119.0(9) |
| O(3)-C(9)         | 1.436(7)         | Cu(1)#2-N(1)-Cu(1)  | 104.8(2) |
| C(8)-O(1)         | 1.279(13)        | N(3)-N(2)-N(1)      | 178.0(9) |
| #1 1-x,-1/2+y,1-z | #2 1-x,1/2+y,1-z |                     |          |

**Table S3.** The charge distributions of Cu(II) ions and coordination atoms for compounds **1** and **2**.

|                    | <b>1</b> (Natural charge $e/m^3$ ) | <b>2</b> (Natural charge $e/m^3$ ) |
|--------------------|------------------------------------|------------------------------------|
| Cu1                | 1.30862                            | 1.30011                            |
| Cu1A               | 1.31061                            | 1.33218                            |
| O1 (carboxylates)  | -0.73609                           | -0.73687                           |
| O1A (carboxylates) | -0.73067                           | -0.74645                           |
| N1                 | -0.71713                           | -0.74951                           |
| O2 (ethanol)       | -0.73942                           | -0.77514                           |

**Table S4.** Atomic spin densities (in au) for compounds **1** and **2** (for def2-tzvp basis set).

| Atoms              | <b>1</b> | <b>2</b> |
|--------------------|----------|----------|
| Cu1                | 0.55850  | 0.55738  |
| Cu1A               | 0.55945  | 0.57177  |
| O1 (carboxylates)  | 0.07784  | 0.07921  |
| O1A (carboxylates) | 0.07571  | 0.08445  |
| N1                 | 0.07485  | 0.08472  |
| O2 (ethanol)       | 0.00026  | 0.00004  |

**Table S5.** Structural and magnetic parameters for Cu(II)-azido mixed-bridged compounds.

| Year | Unit  | Formula                                                                                                                       | Cu-N-Cu(°) | Cu...Cu(Å)<br>(intrachain) | $J^a$ (cm <sup>-1</sup> ) | Ref. |
|------|-------|-------------------------------------------------------------------------------------------------------------------------------|------------|----------------------------|---------------------------|------|
| 1997 | 2Cu   | [Cu <sub>2</sub> (N <sub>3</sub> ) <sub>2</sub> (NO <sub>3</sub> ) <sub>2</sub> (L <sup>1</sup> ) <sub>2</sub> ] <sub>n</sub> | 119.5      | 3.44                       | 26                        | 15b  |
|      | 1Cu   | {[Cu(Hpht)(N <sub>3</sub> )]H <sub>2</sub> O} <sub>n</sub>                                                                    | 111.9      | 3.28                       | 75                        | 15a  |
| 2006 | 1Cu   | [Cu(INO)(N <sub>3</sub> )(H <sub>2</sub> O) <sub>0.5</sub> ] <sub>n</sub>                                                     | 106.6      | 3.22                       | 80                        | 33c  |
|      | 1Cu   | [Cu(NNO)(N <sub>3</sub> )(H <sub>2</sub> O) <sub>0.5</sub> ] <sub>n</sub>                                                     | 124.3      | 3.52                       | 48                        | 33c  |
|      | 1.5Cu | [Cu <sub>1.5</sub> (N <sub>3</sub> ) <sub>2</sub> (isonic)] <sub>n</sub>                                                      | 106.7      | 3.20                       | 80                        | 34a  |
| 2007 | 3Cu   | [Cu <sub>3</sub> ((R)-phea) <sub>2</sub> (N <sub>3</sub> ) <sub>6</sub> ] <sub>n</sub>                                        | 101.8      | 3.04                       | 15.27                     | 34b  |
|      | 3Cu   | [Cu <sub>3</sub> ((S)-phea) <sub>2</sub> (N <sub>3</sub> ) <sub>6</sub> ] <sub>n</sub>                                        |            |                            |                           |      |
|      | 1Cu   | [Cu(N <sub>3</sub> )(nic)] <sub>n</sub>                                                                                       | 113.6      | 3.35                       | 39.1                      | 34c  |
|      | 1.5Cu | [Cu <sub>1.5</sub> (hnta)(N <sub>3</sub> ) <sub>2</sub> (H <sub>2</sub> O)] <sub>n</sub>                                      | 103.2      | 3.12                       | 89                        | 29b  |
|      | 3Cu   | [Cu <sub>3</sub> (hnta) <sub>4</sub> (N <sub>3</sub> ) <sub>2</sub> (H <sub>2</sub> O) <sub>3</sub> ] <sub>n</sub>            | 116.2      | 3.39                       | 69.7                      | 29b  |
| 2008 | 1Cu   | [Cu(N <sub>3</sub> )(tp)(CH <sub>3</sub> OH)] <sub>n</sub>                                                                    | 105.5      | 3.19                       | 63                        | 34d  |
| 2009 | 2Cu   | [Cu <sub>2</sub> (4-pya) <sub>2</sub> (N <sub>3</sub> ) <sub>2</sub> (DMF)] <sub>n</sub>                                      | 102.1      | -                          | 145                       | 33b  |
|      | 1Cu   | [Cu(benzoate)(N <sub>3</sub> )] <sub>n</sub>                                                                                  | 126.8      | 3.54                       | 33.90                     | 18a  |
|      | 1Cu   | [Cu(L <sup>2</sup> )(N <sub>3</sub> )] <sub>n</sub>                                                                           | 108.2      | 3.23                       | 93.10                     | 18a  |
|      | 1Cu   | [Cu(1-naphthoate)(N <sub>3</sub> )] <sub>n</sub>                                                                              | 116.8      | 3.41                       | 65.63                     | 18a  |
|      | 1Cu   | [Cu(N <sub>3</sub> )( <i>p</i> -CPA)] <sub>n</sub>                                                                            | 107.0      | 3.18                       | 68.82                     | 35a  |
| 2010 | 1Cu   | [Cu(2-Clnic)(N <sub>3</sub> )(CH <sub>3</sub> OH)] <sub>n</sub>                                                               | 110.3      | 3.29                       | 81.22                     | 35b  |
|      | 3Cu   | [Cu <sub>3</sub> (pyz) <sub>2</sub> (N <sub>3</sub> ) <sub>6</sub> ] <sub>n</sub>                                             | 100.5      | 3.09                       | 118.8                     | 35c  |

|      |     |                                                                             |                        |                      |                              |           |
|------|-----|-----------------------------------------------------------------------------|------------------------|----------------------|------------------------------|-----------|
| 2011 | 1Cu | $[\text{Cu}(\text{mptz})(\text{N}_3)_2]_n$                                  | 103.3                  | 3.15                 | 65.4                         | 35d       |
|      | 1Cu | $[\text{Cu}(4,3\text{-pybz})(\text{N}_3)]_n$                                | 109.4                  | 3.25                 | 63.9                         | 18b       |
|      | 2Cu | $[\text{Cu}_2(4,4\text{-pybz})_3(\text{N}_3)]_n \cdot 3\text{nH}_2\text{O}$ | 101.1                  | 3.08                 | 93.6                         | 18b       |
| 2012 | 4Cu | $[\text{Cu}_4(\text{N}_3)_8(\text{Me-hmpz})_2]_n$                           | 101.0                  | 3.11                 | $J_1=40.57$<br>$J_2=28.47$   | 35e       |
|      | 4Cu | $[\text{Cu}_4(\text{N}_3)_8(\text{men})_2]_n$                               | 102.2                  | 3.40                 | $J_1=57.97$<br>$J_2=-14.03$  | 35e       |
|      | 5Cu | $[\text{Cu}_5(\text{N}_3)_{10}(\text{N,N-dmen})_2]_n$                       | 101.6                  | 3.40                 | $J_1=-494.99$<br>$J_2=88.60$ | 35e       |
|      | 5Cu | $[\text{Cu}_5(\text{N}_3)_{10}(\text{N,N'-dmen})_5]_n$                      | 102.2                  | 3.50                 | -                            | 35e       |
| 2013 | 4Cu | $[\text{Cu}_4(\text{N}_3)_8(\text{L}^3)_2]_n$                               | 102.9<br>137.1         | 3.12<br>4.13         | $J_1=-0.70$<br>$J_2=64.9$    | 35f       |
|      | 4Cu | $[\text{Cu}_4(\text{N}_3)_6(\text{L}^4)_2(\text{H}_2\text{O})_2]_n$         | 93.4<br>102.1<br>108.9 | 3.10<br>3.22         | $J_1=-81.0$<br>$J_2=112.4$   | 35f       |
|      | 4Cu | $[\text{Cu}_4(\text{N}_3)_6(\text{L}^5)_2]_n$                               | 91.8<br>102.2<br>107.3 | 3.18<br>3.09<br>3.18 | $J_1=-77.9$<br>$J_2=129.9$   | 35f       |
| 2014 | 1Cu | $[\text{Cu}(4\text{-fba})(\text{N}_3)(\text{C}_2\text{H}_5\text{OH})]_n$    | 105.2                  | 3.160                | 36.2                         | 9f        |
|      | 1Cu | $[\text{Cu}(o\text{-npa})(\text{N}_3)(\text{H}_2\text{O})]_n$               | 110.3                  | 3.30                 | 35.44                        | 9g        |
|      | 1Cu | $[\text{Cu}(p\text{-npa})(\text{N}_3)]_n$                                   | 120.4                  | 3.39                 | 52.25                        | 9g        |
|      | 1Cu | $[\text{Cu}(p\text{-mpa})(\text{N}_3)]_n$                                   | 122.4                  | 3.46                 | -                            | 9g        |
| 2015 | 1Cu | $[\text{Cu}(\text{L})(\text{N}_3)_2]_n$                                     | 89.8                   | 3.199                | 1.07                         | 36a       |
| 2016 | 1Cu | $[(\text{CuN}_3(\text{OH}_2))_2(\text{adp})]_n$                             | 108.09                 | 3.248                | 38.4                         | 36b       |
| 2017 | 1Cu | $[\text{Cu}(2\text{-fba})(\text{N}_3)(\text{CH}_3\text{OH})]_n$             | 106.54                 | 3.206                | 63.54                        | 37        |
|      | 1Cu | $[\text{Cu}(2,6\text{-dfba})(\text{N}_3)(\text{CH}_3\text{OH})]_n$          | 110.08                 | 3.261                | 96.29                        | 37        |
|      | 1Cu | $[\text{Cu}(o\text{-fpa})(\text{N}_3)(\text{C}_2\text{H}_5\text{OH})]_n$    | 106.8                  | 3.218                | 87.08                        | This work |
|      | 1Cu | $[\text{Cu}(p\text{-fpa})(\text{N}_3)(\text{C}_2\text{H}_5\text{OH})]_n$    | 104.8                  | 3.168                | 66.05                        | This work |

$J^n$  : intrachain coupling.

L1 =  $\text{Me}_3\text{NCH}_2\text{CO}_2$ , Hpht = hydrogen phthalate, INO = isonicotinate *N*-oxide, NNO = nicotinate *N*-oxide, isonic = isonicotinate, phea = 1-phenylethylamine, nic = nicotinate, hnta = 6-hydroxynicotinate, tp = terephthalate, 4-Hpya

= 4-pyridylacrylic acid, L<sup>2</sup> = 2-methyl-benzoate, *p*-CPAH = *p*-cyanophenoxyacetic acid, 2-Clnic = 2-chloronicotinate, pyz = pyrazine, mptz = *N*-methyl-4-pyridinium tetrazolate, 4,3-pybz = 4-(3-pyridyl)benzoate, 4,4-pybz = 4-(4-pyridyl)benzoate, Me-hmpz = 1-methylhomopiperazine, men = *N*-methylethylenediamine, *N,N*-dmen = *N,N*-dimethylethylenediamine, *N,N'*-dmen = *N,N'*-dimethylethylenediamine, L<sup>3</sup> is the imine resulting from the condensation of pyridine-2-carboxaldehyde with *N*-methylethylenediamine, HL<sup>4</sup> and HL<sup>5</sup> are the condensation products of 2-hydroxy-3-methoxybenzaldehyde with *N,N*-diethylethylenediamine and *N*-ethylethylenediamine respectively, 4-Hfba = 4-fluorobenzoic acid, *o*-Hfpa = *o*-fluorophenylacetic acid, *p*-Hfpa = *p*-fluorophenylacetic acid, L = *N*-benzyl ethylenediamine, adp = adipic acid, 2-Hfba = 2-fluorobenzoic acid, 2,6-Hdfba = 2,6-difluorobenzoic acid, *o*-Hnpa = *o*-nitrophenylacetic acid, *p*-Hnpa = *p*-nitrophenylacetic acid, and *p*-Hmpa = *p*-methylphenylacetic acid.

All of the *J* values were quoted using the Hamiltonian  $H = -J\sum S_i \cdot S_{i+1}$ .

**Table S6.** Structural and magnetic parameters for four triple-bridged azido-Cu(II) compounds.

| Formula                                                                              | Cu-N-Cu(°) | Cu-Cu (Å)<br>(intrachain) | Hydrogen-bonding (Å)<br>(interchain) | Cu...Cu (Å)<br>(interchain) | <i>J</i> <sup>a</sup> (cm <sup>-1</sup> ) | Ref.      |
|--------------------------------------------------------------------------------------|------------|---------------------------|--------------------------------------|-----------------------------|-------------------------------------------|-----------|
| [Cu( <i>o</i> -fpa)(N <sub>3</sub> )(C <sub>2</sub> H <sub>5</sub> OH)] <sub>n</sub> | 106.8      | 3.218                     | 2.901                                | 7.615                       | 87.08                                     | This work |
| [Cu( <i>p</i> -fpa)(N <sub>3</sub> )(C <sub>2</sub> H <sub>5</sub> OH)] <sub>n</sub> | 104.8      | 3.168                     | 2.902                                | 7.562                       | 66.05                                     | This work |
| [Cu(2-fba)(N <sub>3</sub> )(CH <sub>3</sub> OH)] <sub>n</sub>                        | 106.6      | 3.206                     | 2.861                                | 7.512                       | 63.54                                     | 37        |
| [Cu(2,6-dfba)(N <sub>3</sub> )(CH <sub>3</sub> OH)] <sub>n</sub>                     | 110.3      | 3.266                     | 2.927                                | 7.784                       | 96.29                                     | 37        |
